# Supplementary material
Source: publisher figshare collection journal article supplement (https://asha.figshare.com/articles/dataset/_/24282676)

### Supplemental Material S3. Average trace plots for each study.

The following plots show average traces across participants for each study, with 95% confidence intervals shown in grey. If the 95% confidence interval bounds are greater than 0 for four consecutive trials, then the bounds are shown in red; similarly, if the 95% confidence interval bounds are less than 0 for four consecutive trials, the interval is shown in blue. When possible, up and down shift data are plotted separately. Average reflexive traces are all plotted relative to perturbation onset, such that perturbation onset occurs at time 0. Perturbation onset is marked with a solid line, while dotted lines indicate the selected measurement window for analyses of compensation magnitude.

#### Reflexive $f_o$ YA:

##### Study 02:

Study-02 Down Shift: Reflexive  $f_o$  YA

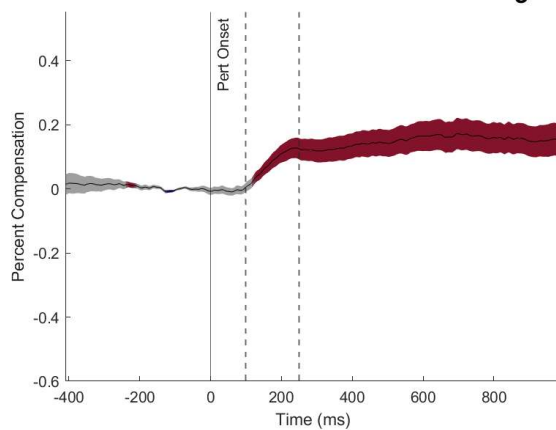

Study-02 Up Shift: Reflexive  $f_o$  YA

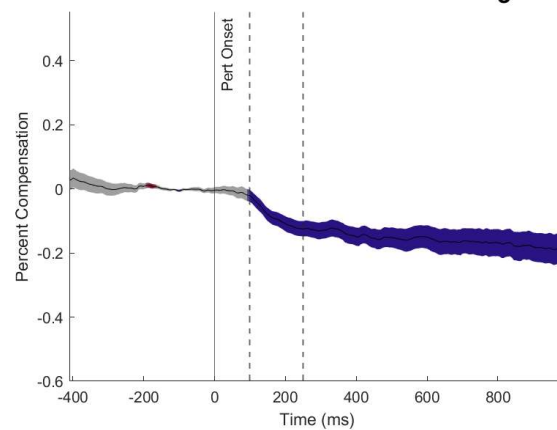

##### Study 03:

Study-03 Up Shift: Reflexive  $f_o$  YA

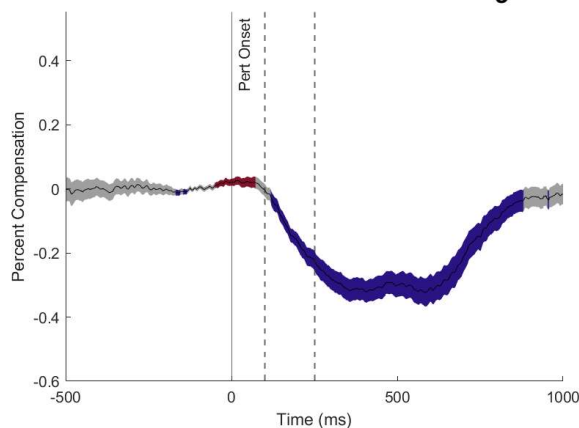

## Study 04:

**Study-04 Down Shift: Reflexive  $f_o$  YA**

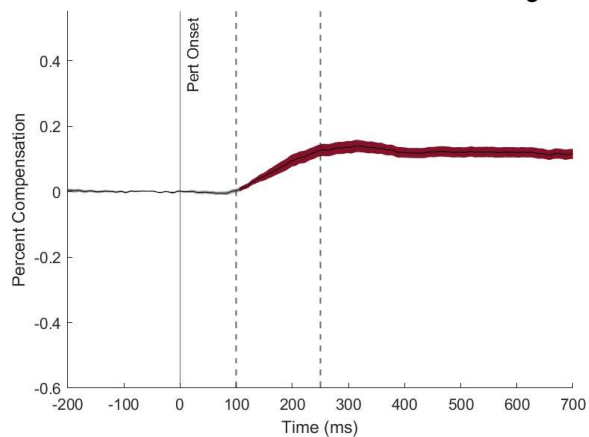

**Study-04 Up Shift: Reflexive  $f_o$  YA**

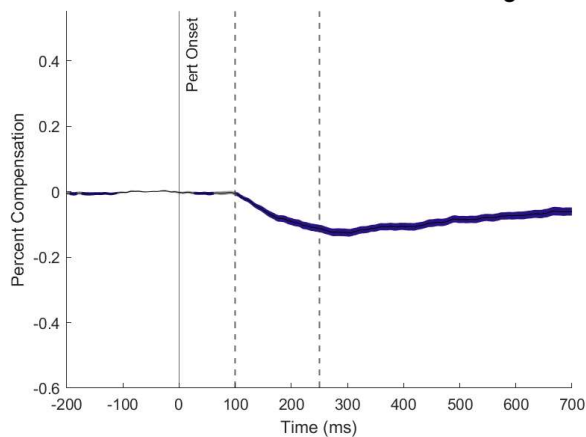

## Study 05:

**Study-05 Down Shift: Reflexive  $f_o$  YA**

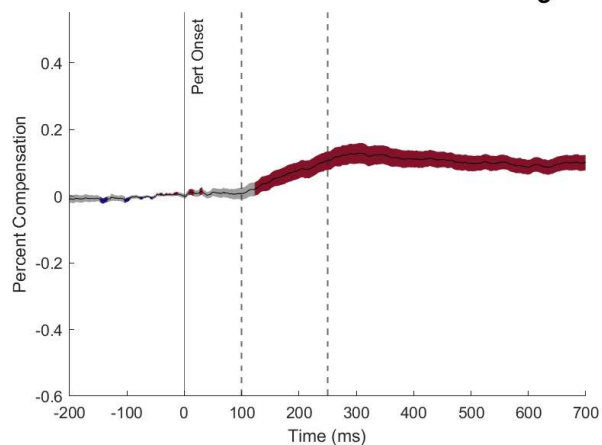

**Study-05 Up Shift: Reflexive  $f_o$  YA**

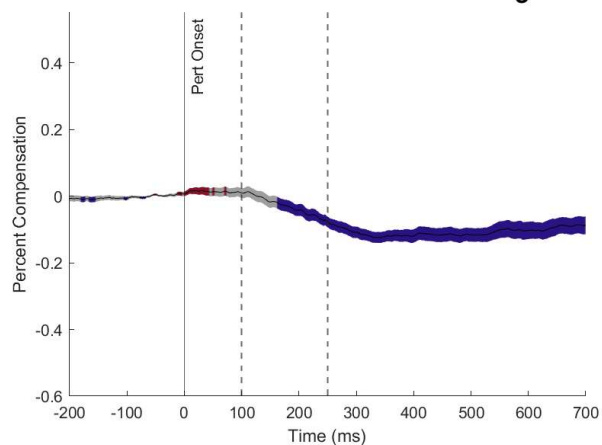

## Study 06:

**Study-06 Down Shift: Reflexive  $f_o$  YA**

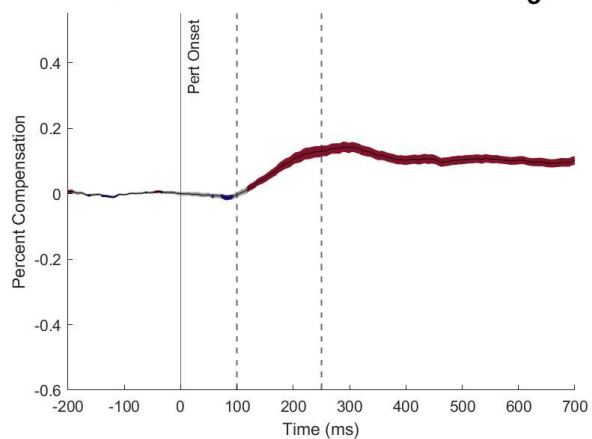

**Study-06 Up Shift: Reflexive  $f_o$  YA**

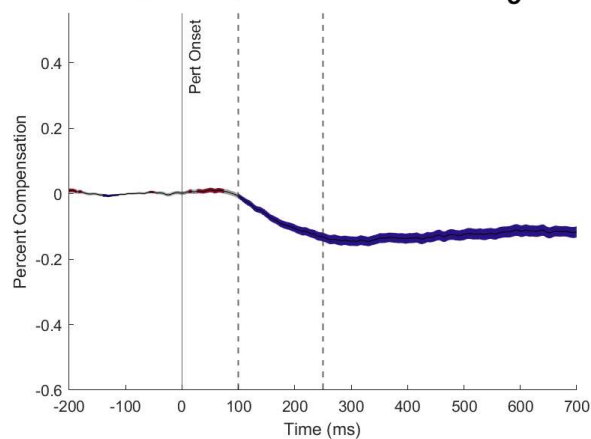

## Study 07:

**Study-07 Down Shift: Reflexive  $f_o$  YA**

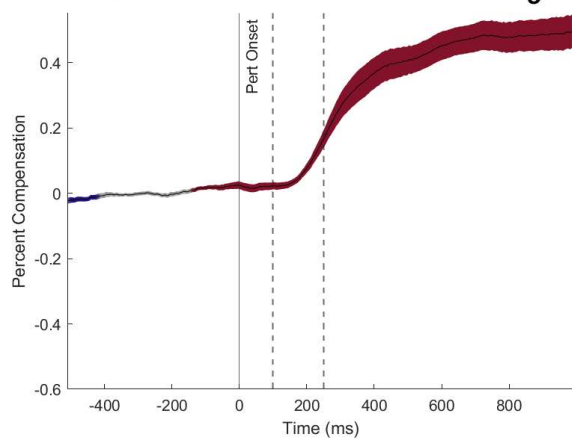

## Study 09:

**Study-09 Down Shift: Reflexive  $f_o$  YA**

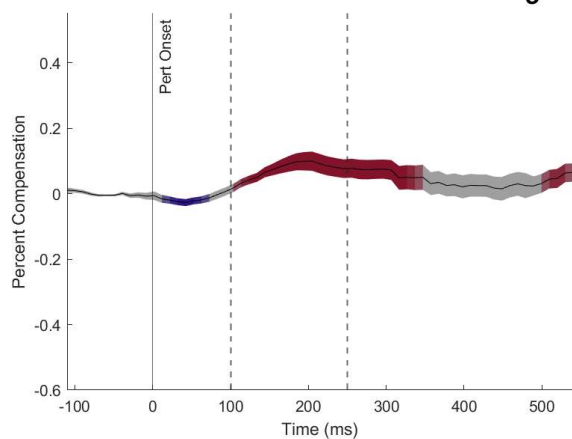

**Study 22 (combined up and down shift data):**

**Study-22: Reflexive  $f_o$  YA**

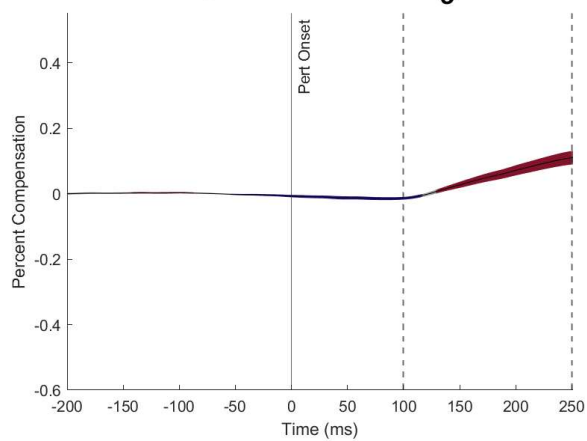

## Reflexive $f_0$ OA:

### Study 01:

#### Study-01 Up Shift: Reflexive $f_0$ OA

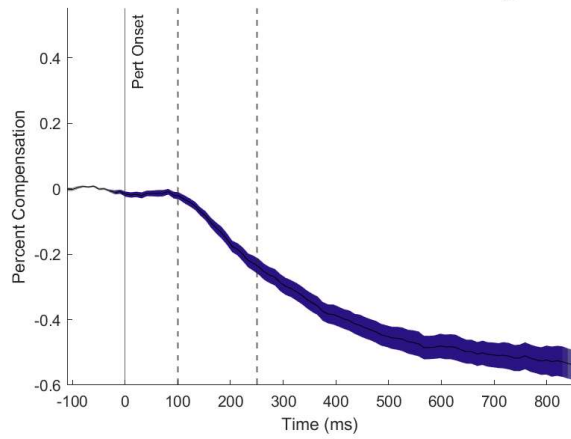

### Study 08:

#### Study-08 Up Shift: Reflexive $f_0$ OA

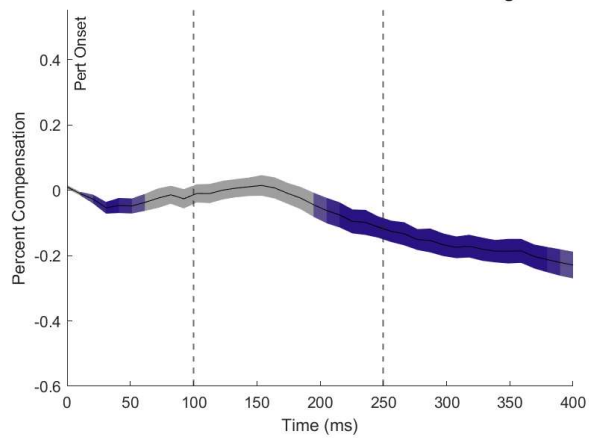

## Reflexive $f_0$ PD:

### Study 01:

#### Study-01 Up Shift: Reflexive $f_0$ PD

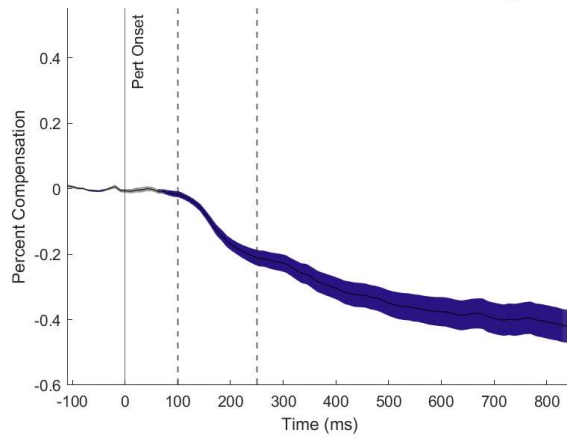

### Study 08:

#### Study-08 Up Shift: Reflexive $f_0$ PD

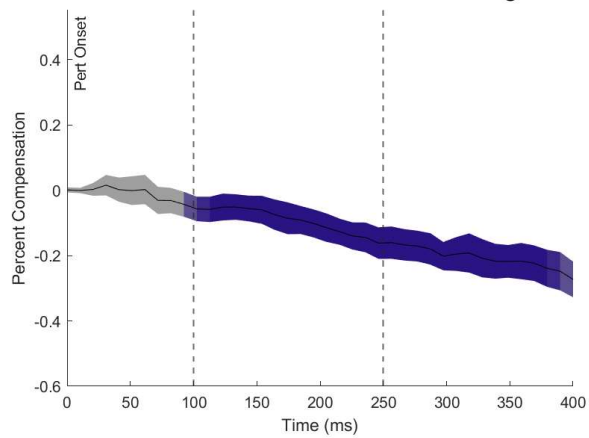

## Reflexive *F1* YA:

### Study 09:

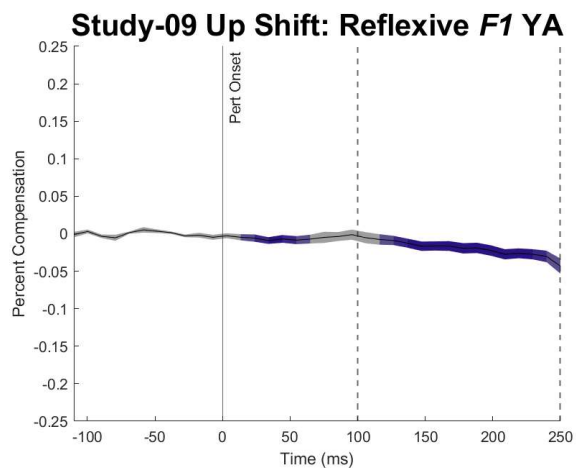

### Study 10:

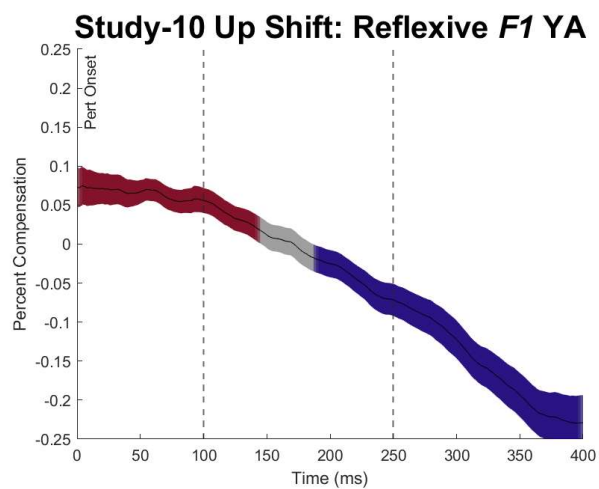

### Study 11:

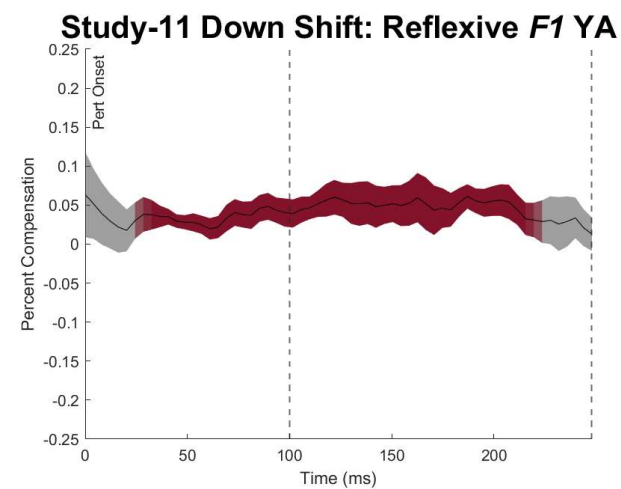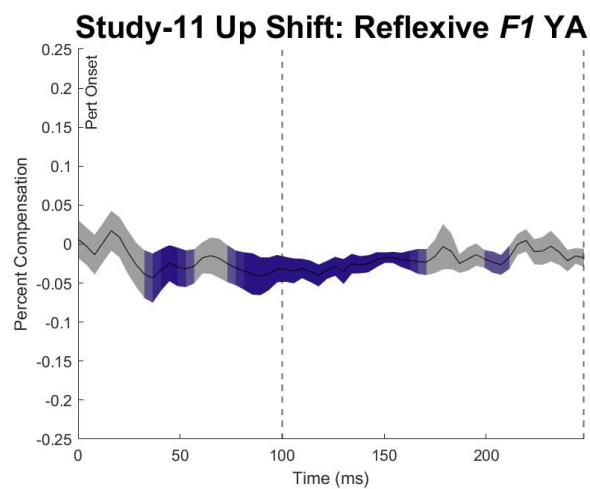

## Study 12:

**Study-12 Down Shift: Reflexive  $F1$  YA**

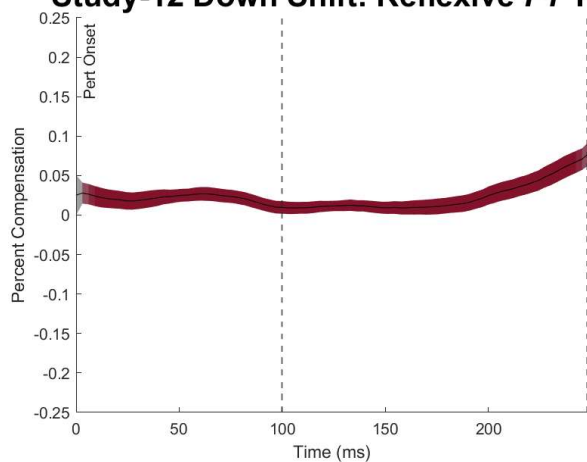

**Study-12 Up Shift: Reflexive  $F1$  YA**

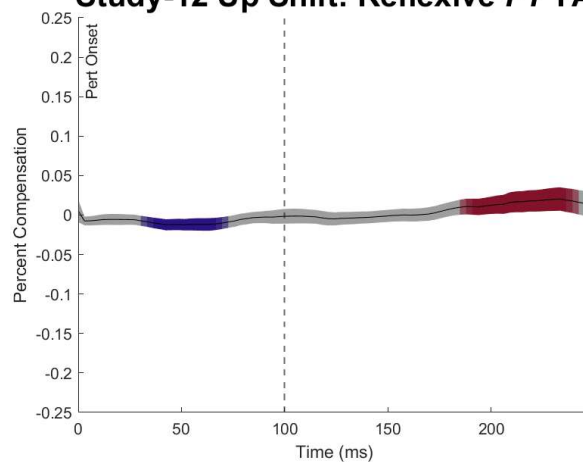

## Study 13:

**Study-13 Down Shift: Reflexive  $F1$  YA**

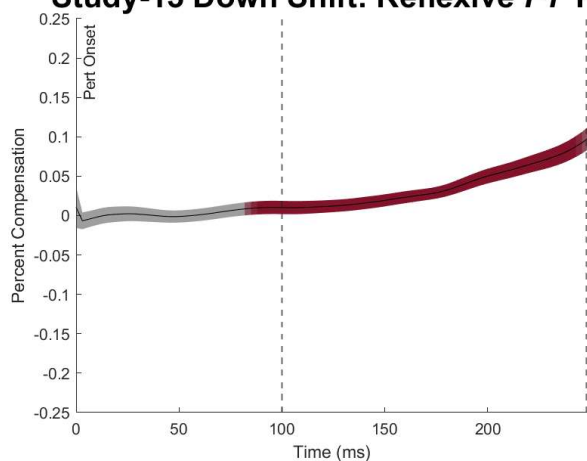

**Study-13 Up Shift: Reflexive  $F1$  YA**

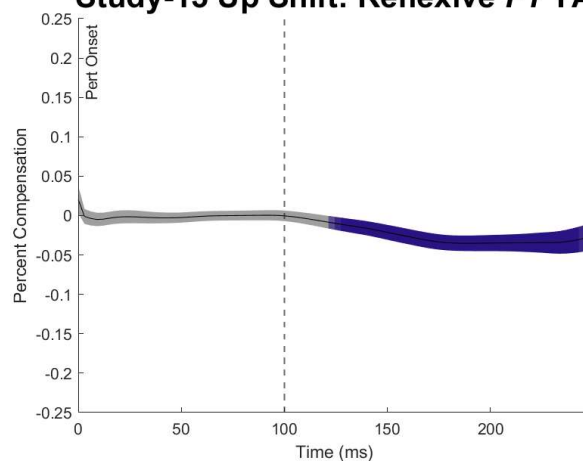

## Study 22 (combined up and down shift data):

**Study-22: Reflexive  $f_o$  YA**

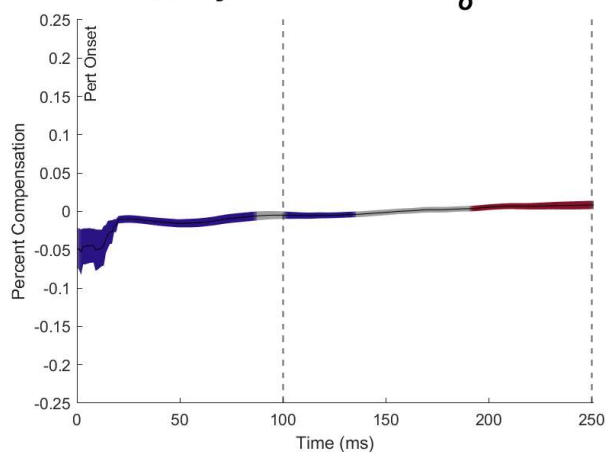



## Reflexive *F1* OA:

### Study 1:

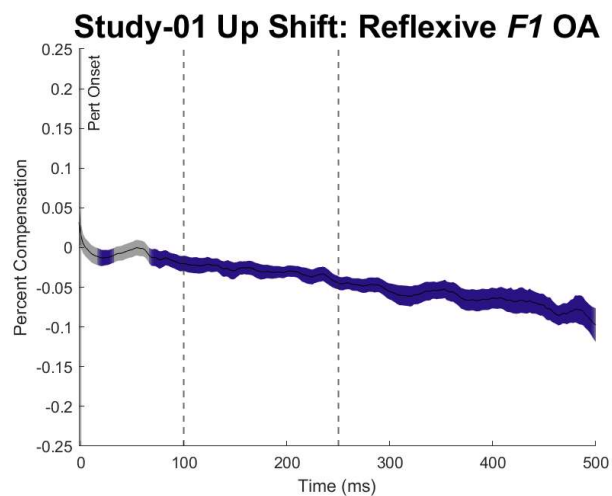

### Study 8:

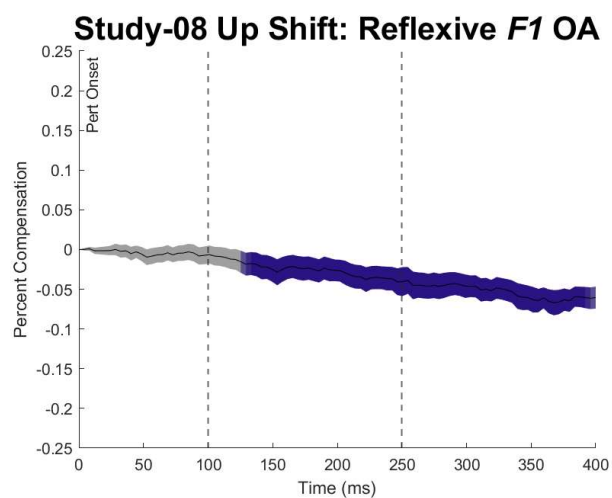

### Study 14:

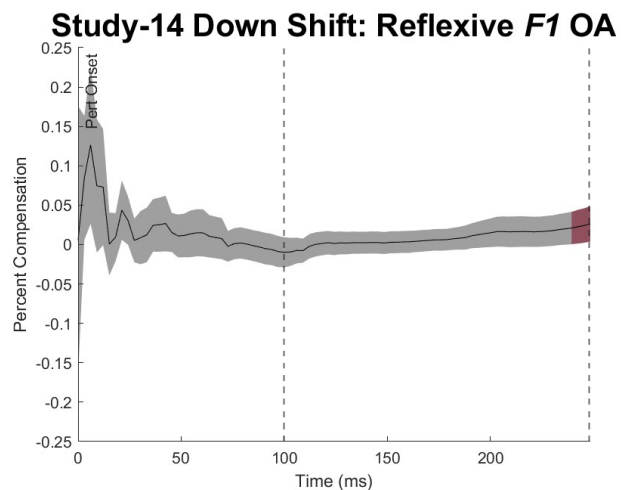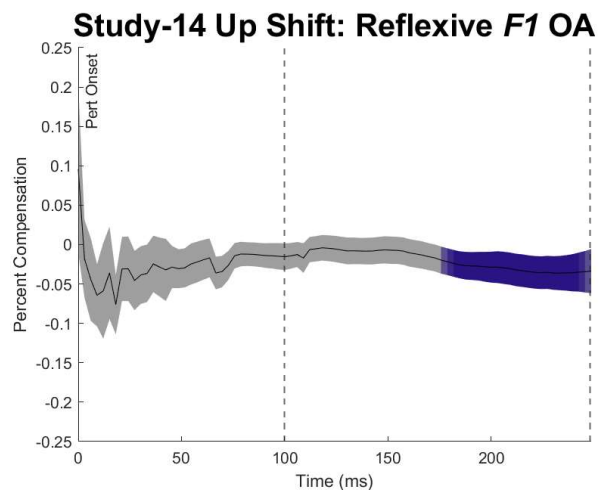

### Study 15:

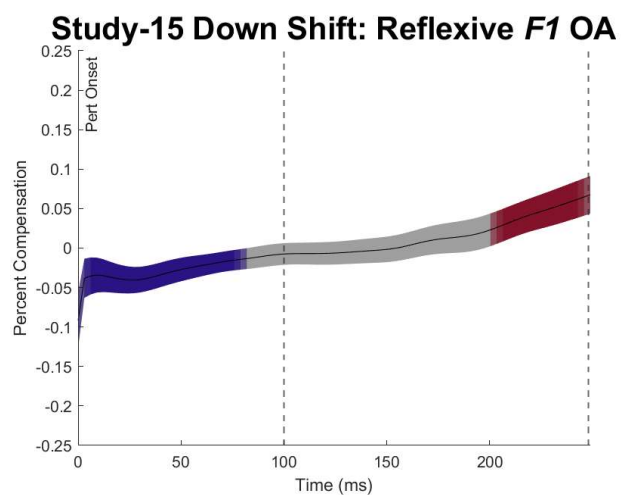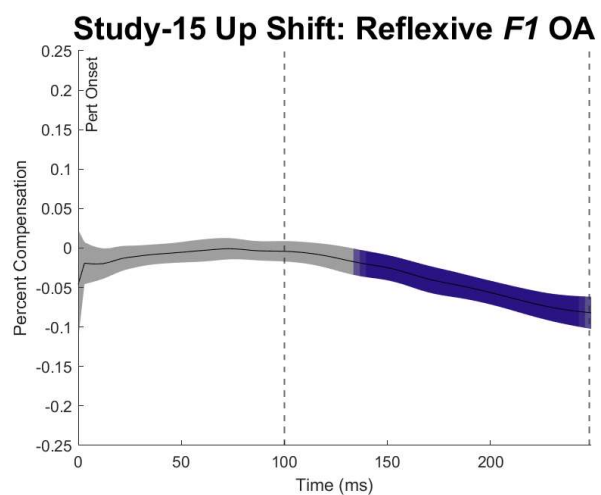

## Reflexive *F1* PD:

### Study 01:

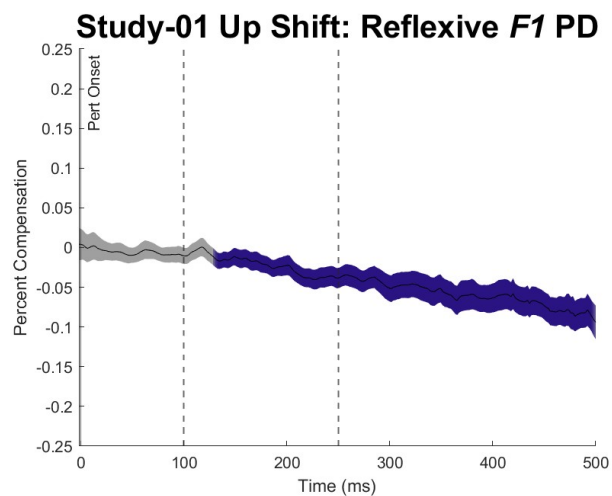

### Study 08:

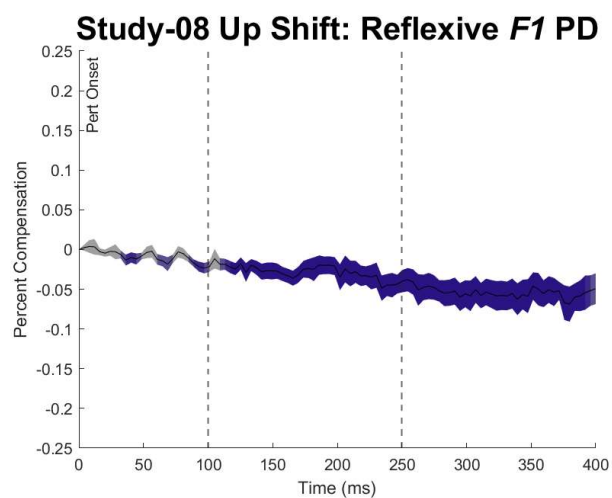

## Adaptive $f_0$ YA:

### Study 02:

#### Study-02 Down Shift: Adaptive $f_0$ YA

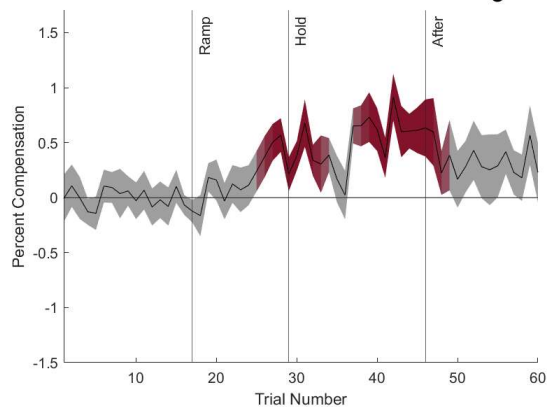

#### Study-02 Up Shift: Adaptive $f_0$ YA

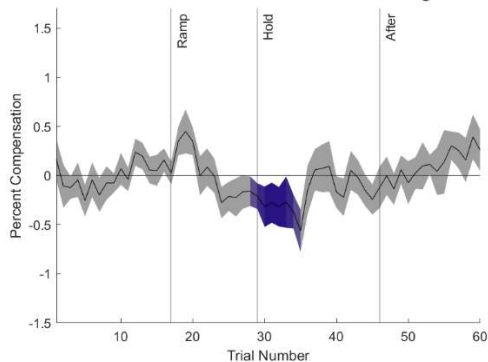

### Study 21:

#### Study-21 Down Shift: Adaptive $f_0$ YA

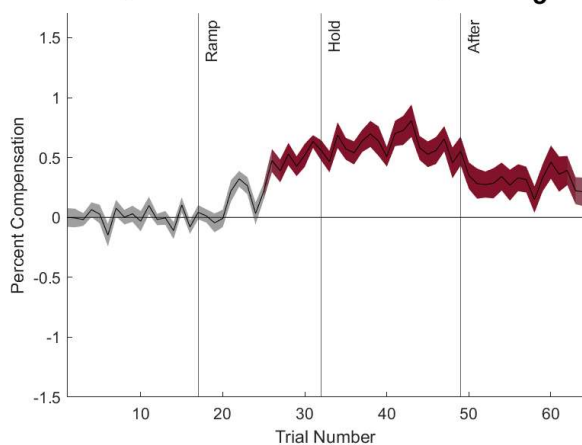

### Study 22:

#### Study-22 Down Shift: Adaptive $f_0$ YA

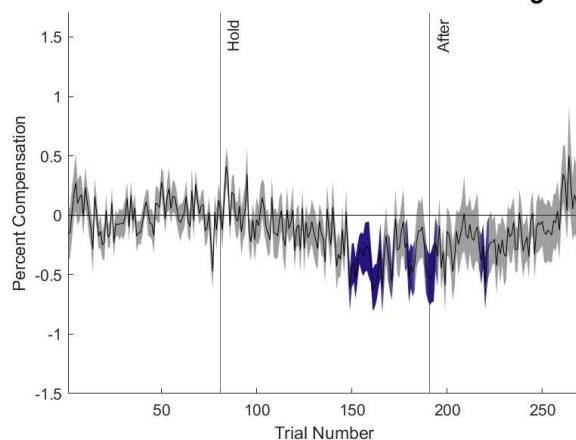

#### Study-22 Up Shift: Adaptive $f_0$ YA

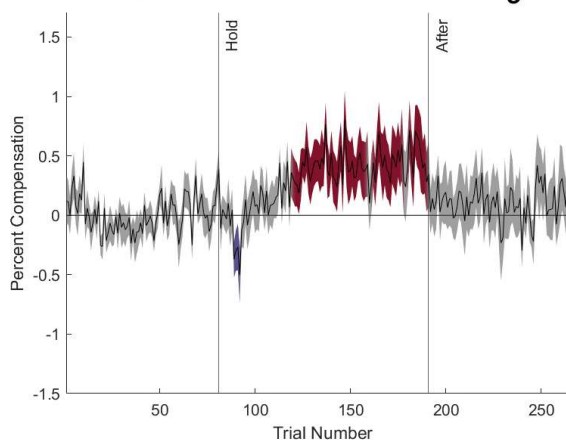

## Adaptive $f_0$ OA:

### Study 01:

#### Study-01 Up Shift: Adaptive $f_0$ OA

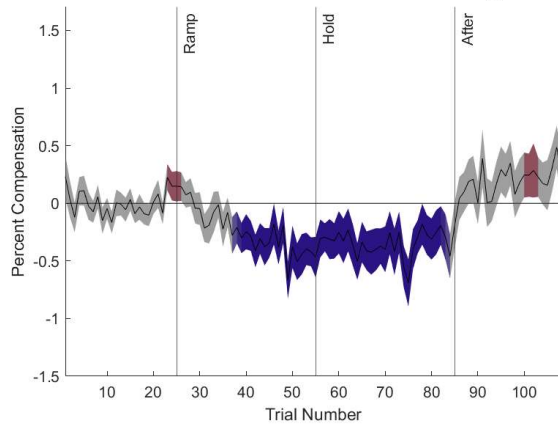

### Study 16:

#### Study-16 Down Shift: Adaptive $f_0$ OA

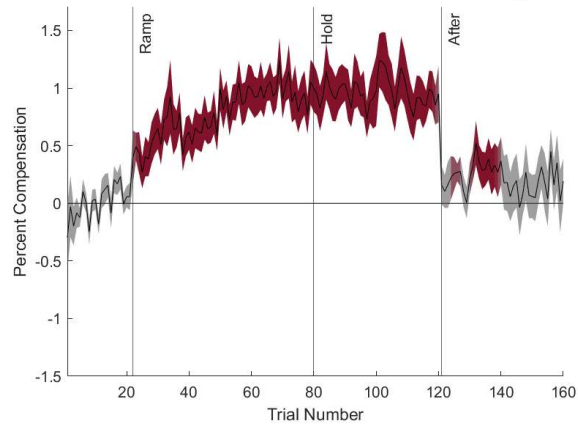

#### Study-16 Up Shift: Adaptive $f_0$ OA

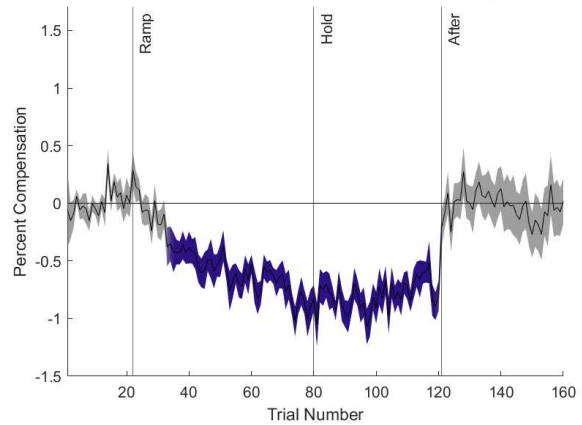

## Adaptive $f_0$ PD:

### Study 01:

#### Study-01 Up Shift: Adaptive $f_0$ PD

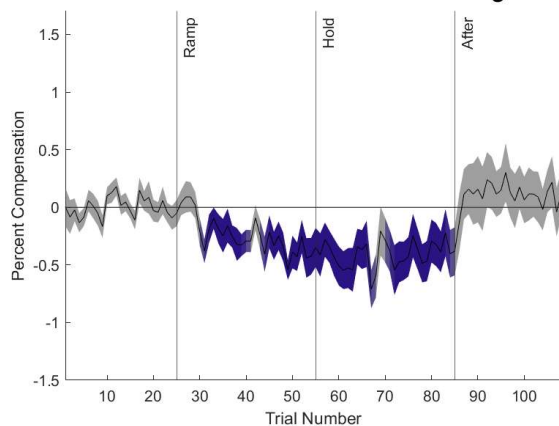

### Study 16:

#### Study-16 Down Shift: Adaptive $f_0$ PD

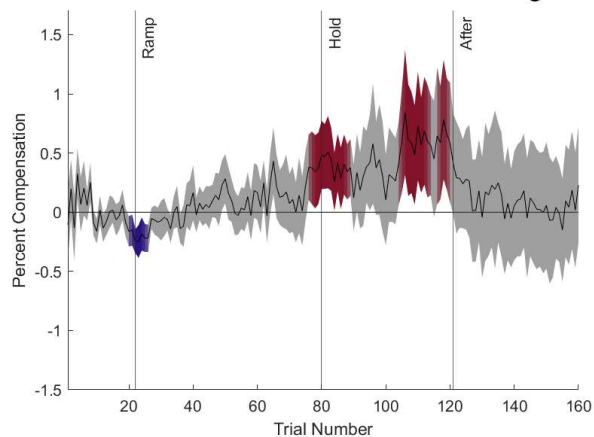

#### Study-16 Up Shift: Adaptive $f_0$ PD

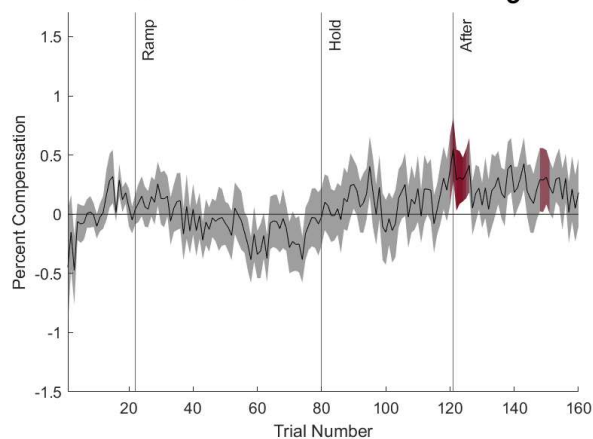

## Adaptive F1 YA:

### Study 17:

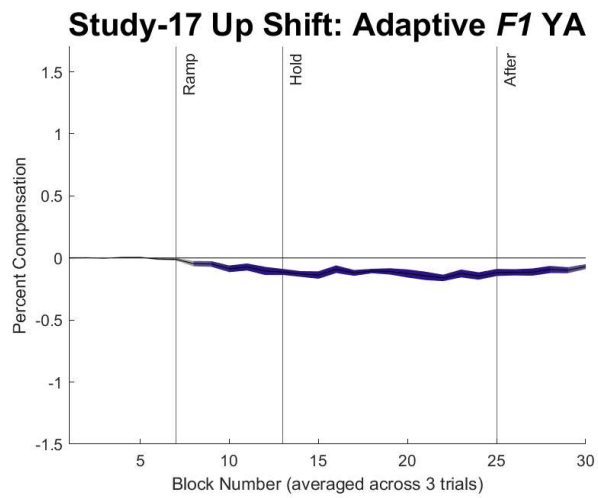

### Study 18:

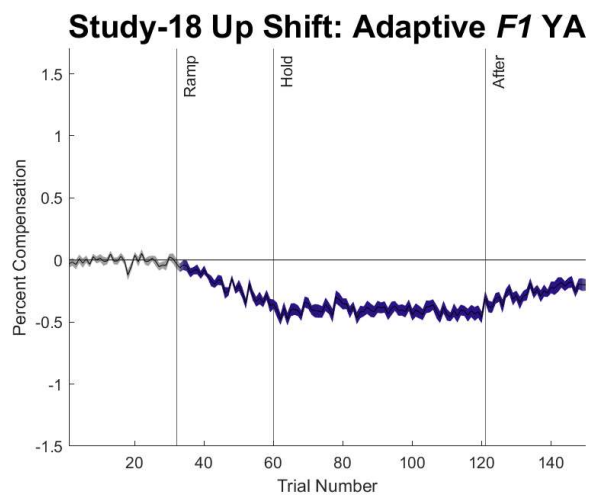

### Study 19:

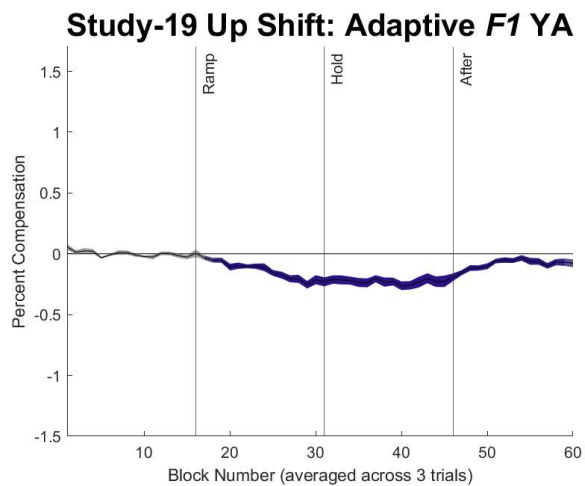

## Study 20:

### Study-20 Up Shift: Adaptive *F1* YA

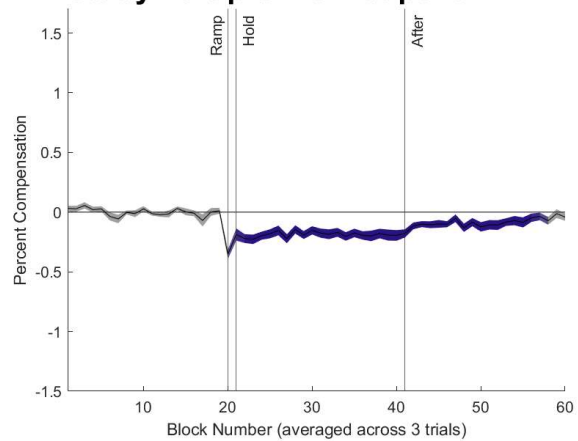



## Adaptive *F1* OA:

### Study 01:

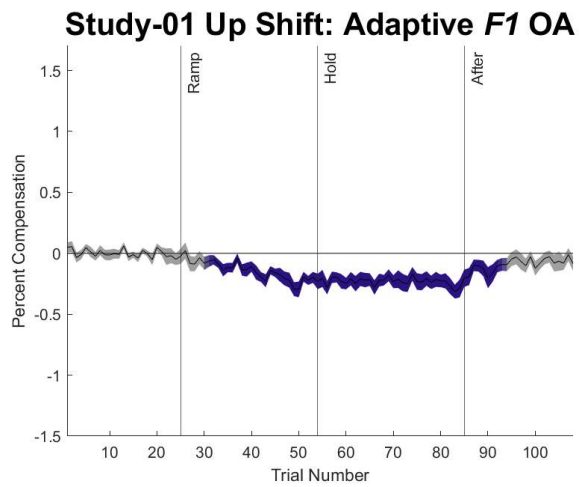

### Study 15:

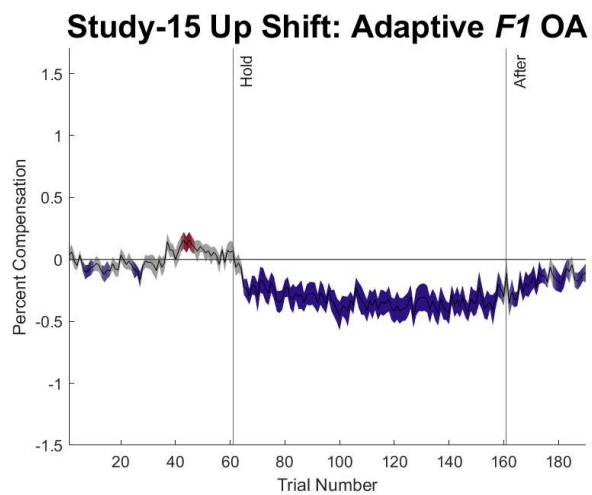

## Adaptive F1 PD:

### Study 01:

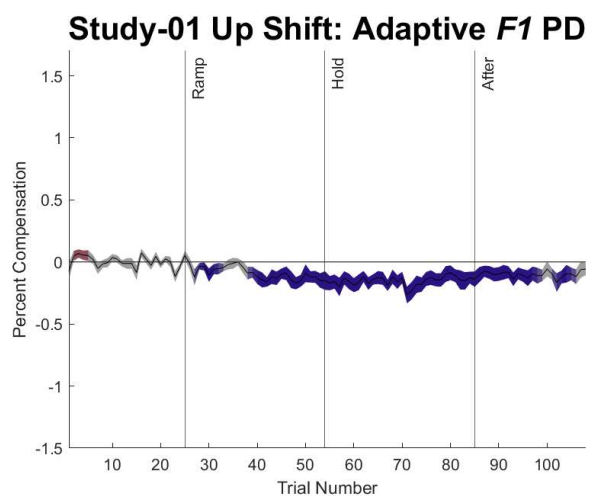

Supplement: Supplementary file 2 [file 1]
