# Supplementary material
Source: publisher figshare collection journal article supplement (https://asha.figshare.com/articles/dataset/_/24282676)

**Supplemental Material S2.** Summary of descriptive statistics and distributions for individual studies.

**Table S2.** Summary of median percent compensation and interquartile range (IQR) for each reflexive pitch study.

| Study | Group | Median | IQR   |
|-------|-------|--------|-------|
| 02    | YA    | 5.90   | 7.60  |
| 03    | YA    | 13.84  | 17.11 |
| 04    | YA    | 6.13   | 7.46  |
| 05    | YA    | 3.29   | 4.26  |
| 06    | YA    | 6.62   | 8.27  |
| 07    | YA    | 16.76  | 25.09 |
| 09    | YA    | 5.74   | 15.25 |
| 22    | YA    | 3.76   | 9.17  |
| 01    | OA    | 12.26  | 9.41  |
| 08    | OA    | 0.39   | 14.40 |
| 01    | PD    | 11.50  | 9.24  |
| 08    | PD    | 13.95  | 16.20 |

*Note.* OA = older adults; PD = Parkinson's disease; YA = young adults.

**Figure S2.** Histograms for each reflexive pitch ( $f_o$ ) study, young adult (YA).

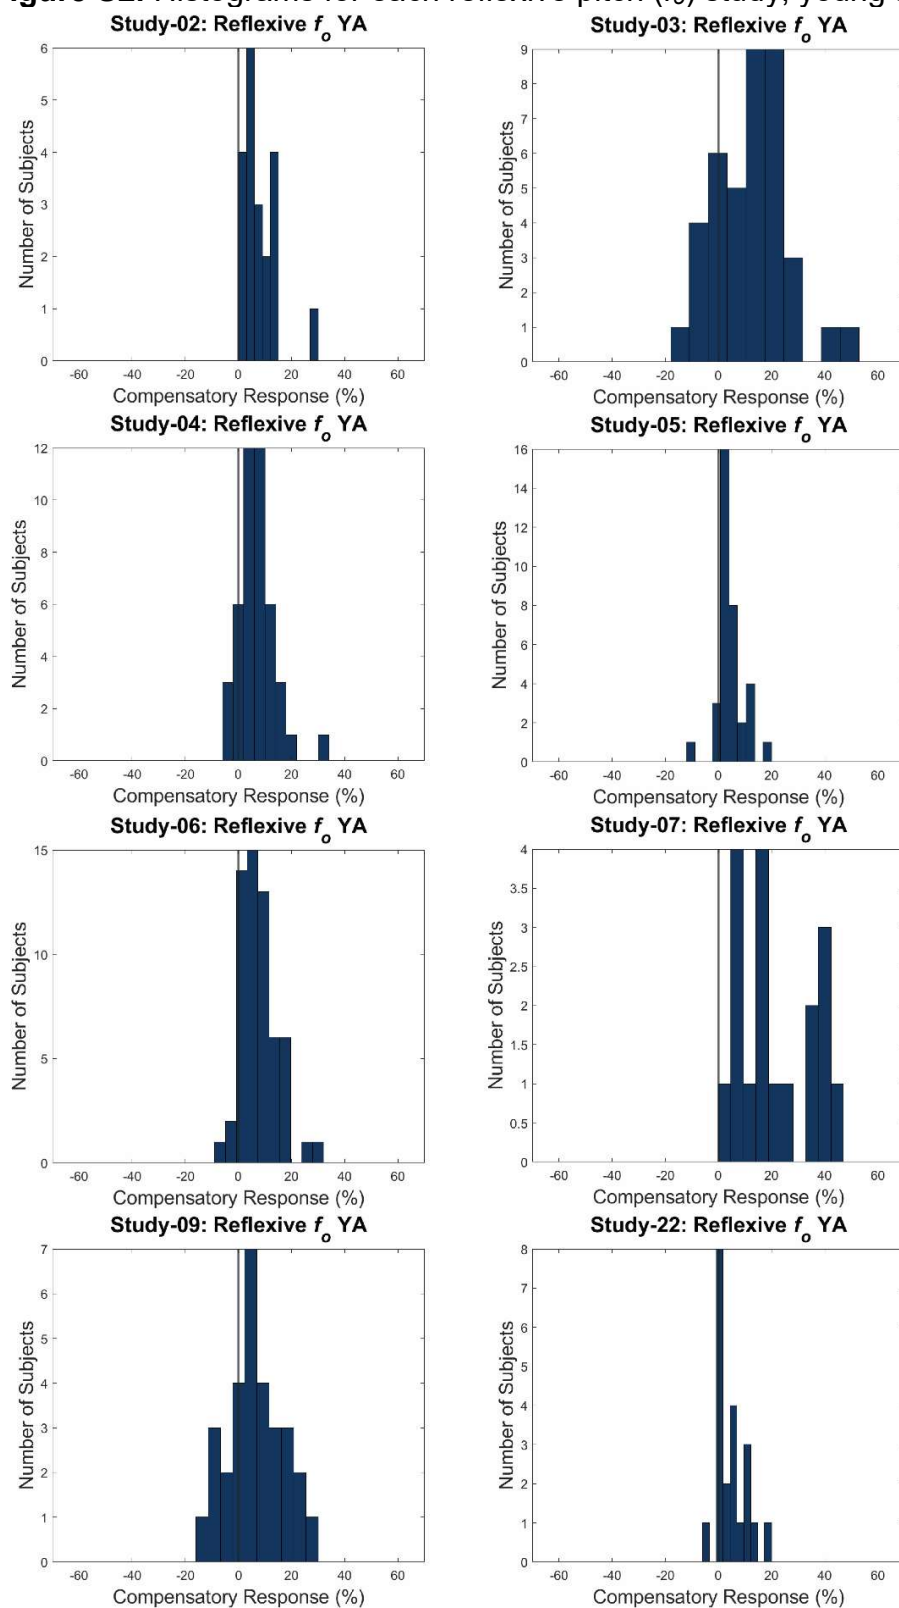

**Figure S3.** Histograms for each reflexive pitch ( $f_o$ ) study, older adult (OA) and Parkinson's disease groups (PD).

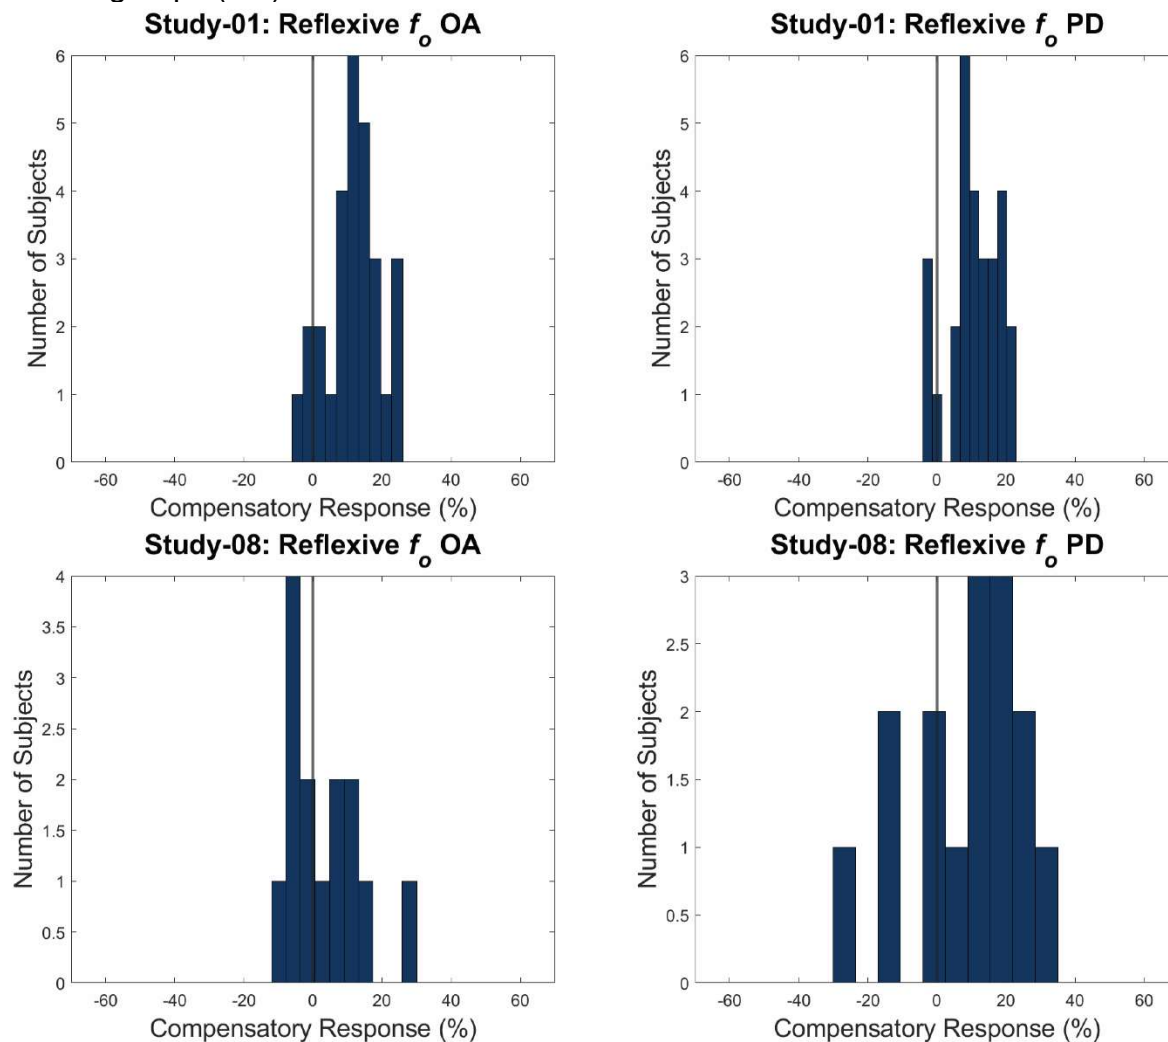

**Table S3.** Summary of median percent compensation and interquartile range (IQR) for each reflexive formant study.

| <b>Study</b>                                                                 | <b>Group</b> | <b>Median</b> | <b>IQR</b> |
|------------------------------------------------------------------------------|--------------|---------------|------------|
| 09                                                                           | YA           | 1.24          | 4.55       |
| 10                                                                           | YA           | 0.35          | 4.72       |
| 11                                                                           | YA           | 0.25          | 5.24       |
| 12                                                                           | YA           | 1.72          | 1.98       |
| 13                                                                           | YA           | 3.77          | 5.28       |
| 22                                                                           | YA           | 0.26          | 2.10       |
| 01                                                                           | OA           | 2.32          | 2.60       |
| 08                                                                           | OA           | 3.29          | 6.58       |
| 14                                                                           | OA           | 2.09          | 2.47       |
| 15                                                                           | OA           | 2.46          | 5.16       |
| 01                                                                           | PD           | 1.65          | 3.92       |
| 08                                                                           | PD           | 1.45          | 3.79       |
| <i>Note.</i> OA = older adults; PD = Parkinson's disease; YA = young adults. |              |               |            |

**Figure S4.** Histograms for each reflexive formant ( $F1$ ) study, young adult (YA).

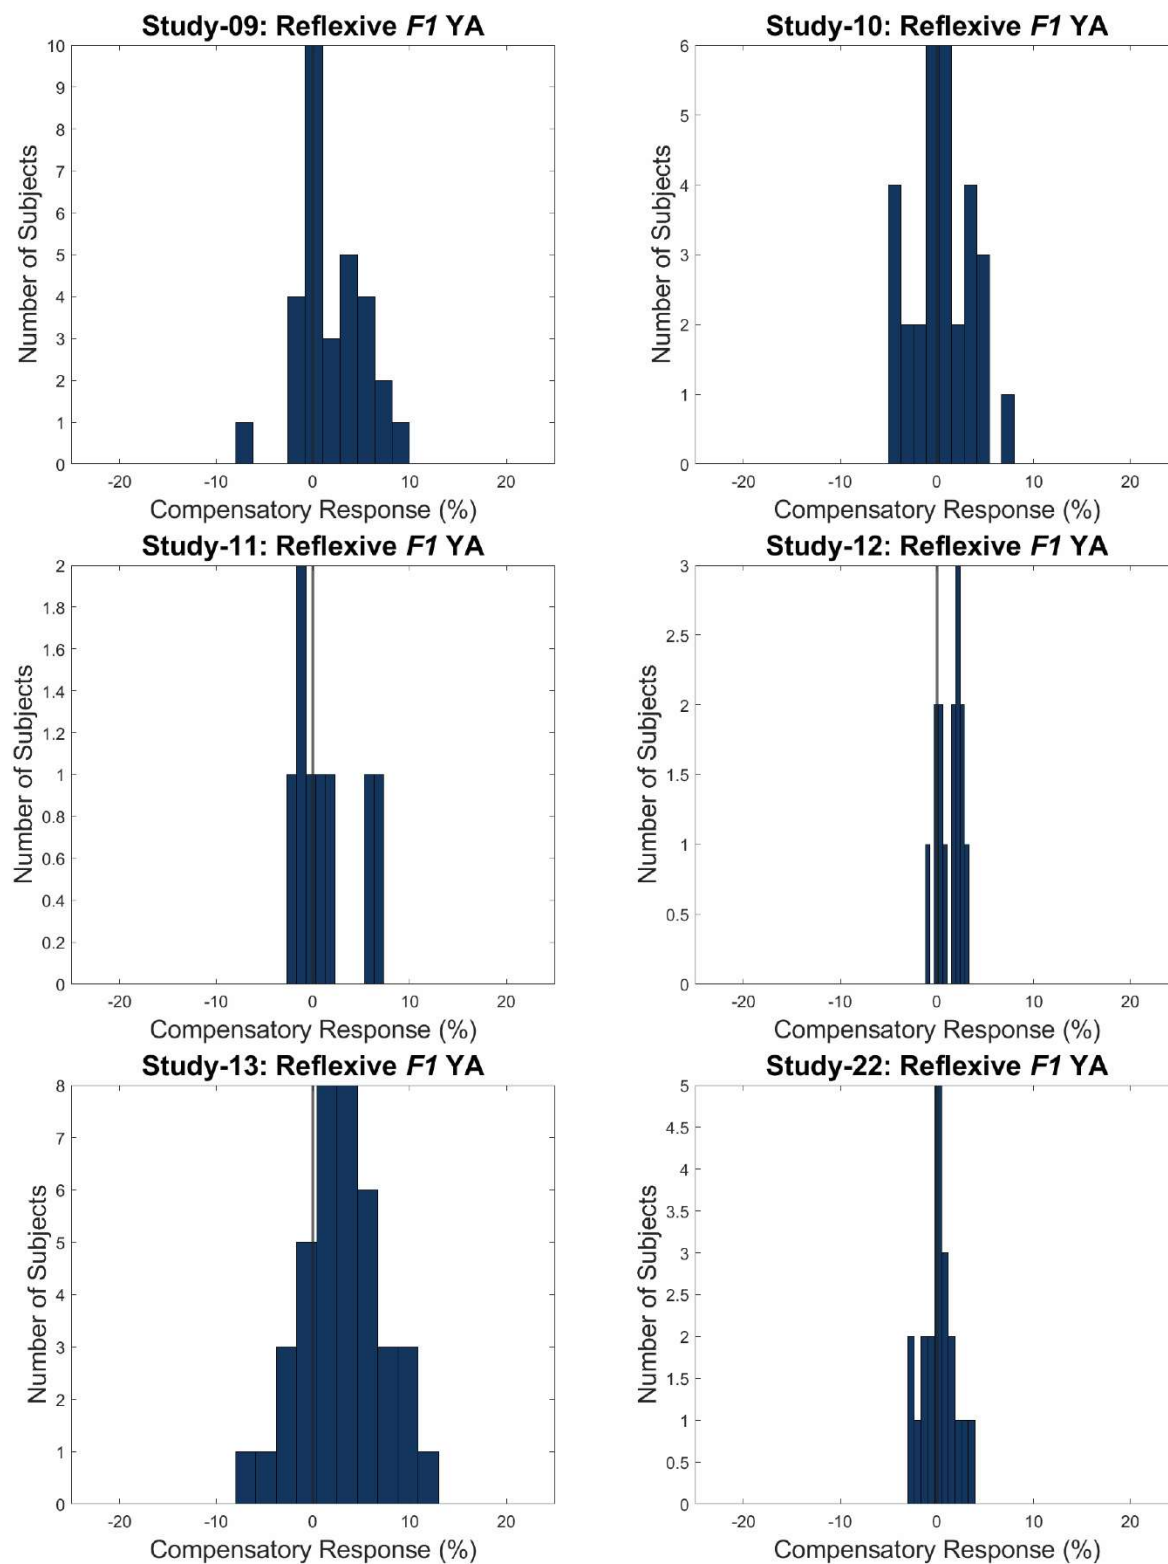

**Figure S5.** Histograms for each reflexive formant ( $F1$ ) study, older adult (OA) and Parkinson's disease groups (PD).

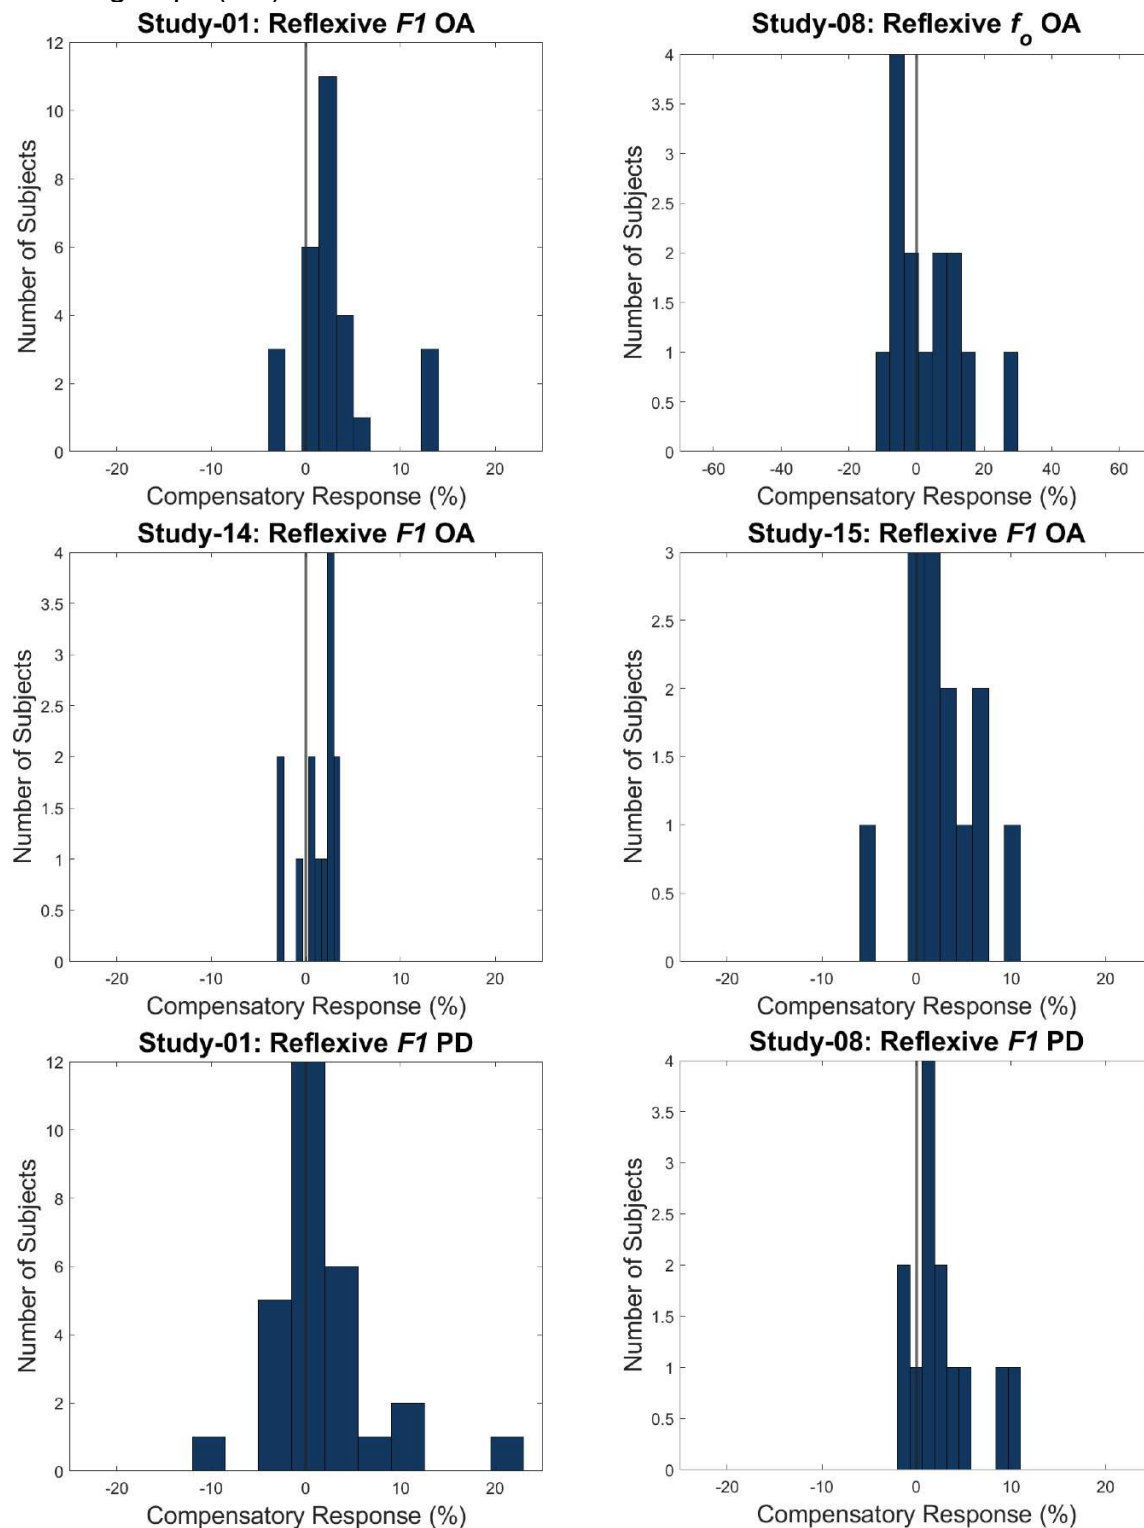

**Table S4.** Summary of median percent adaptation (as measured across first 3 after-effect trials) and interquartile range (IQR) for each adaptive pitch study.

| <b>Study</b> | <b>Group</b> | <b>Median</b> | <b>IQR</b> |
|--------------|--------------|---------------|------------|
| 02           | YA           | 23.91         | 32.95      |
| 21           | YA           | 38.61         | 52.75      |
| 22           | YA           | -34.52        | 53.56      |
| 01           | OA           | 7.77          | 111.11     |
| 16           | OA           | 19.77         | 84.10      |
| 01           | PD           | 0.41          | 169.25     |
| 16           | PD           | -1.14         | 97.47      |

*Note.* OA = older adults; PD = Parkinson's disease; YA = young adults.

**Figure S6.** Histograms for each adaptive pitch ( $f_o$ ) study. OA = older adult; PD = Parkinson's disease; YA = younger adult.

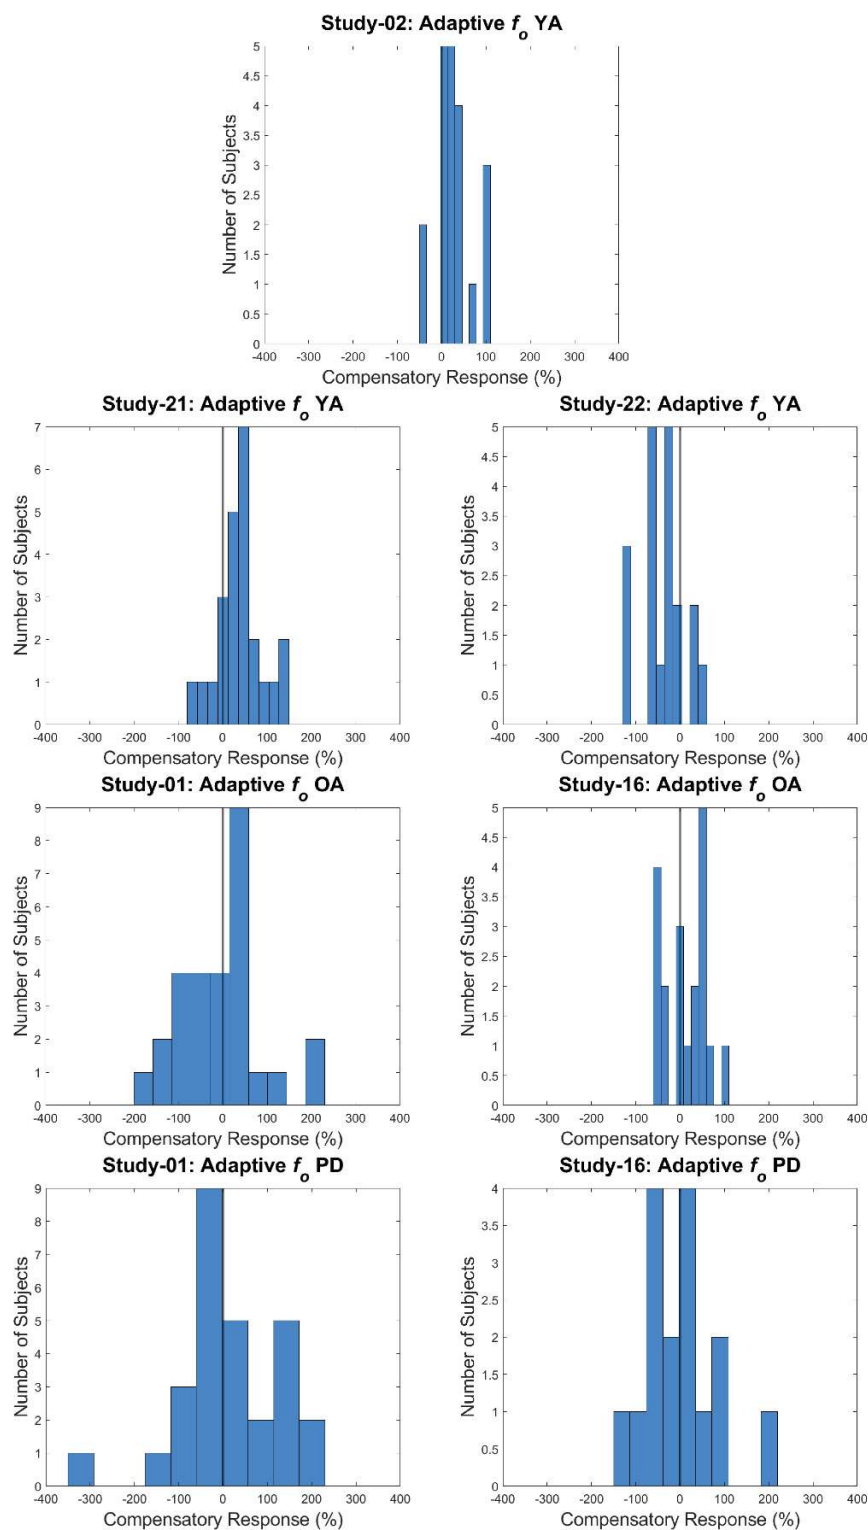



**Table S5.** Summary of median percent adaptation (as measured across first 3 after-effect trials) and interquartile range (IQR) for each adaptive formant study.

| <b>Study</b> | <b>Group</b> | <b>Median</b> | <b>IQR</b> |
|--------------|--------------|---------------|------------|
| 17           | YA           | 9.61          | 15.75      |
| 18           | YA           | 37.59         | 37.44      |
| 19           | YA           | 19.30         | 15.16      |
| 20           | YA           | 18.87         | 29.28      |
| 01           | OA           | 16.15         | 30.11      |
| 15           | OA           | 28.72         | 30.93      |
| 01           | PD           | 6.02          | 27.03      |

*Note.* OA = older adults; PD = Parkinson's disease; YA = young adults.

**Figure S7.** Histograms for each adaptive formant ( $F1$ ) study. OA = older adult; PD = Parkinson's disease; YA = younger adult.

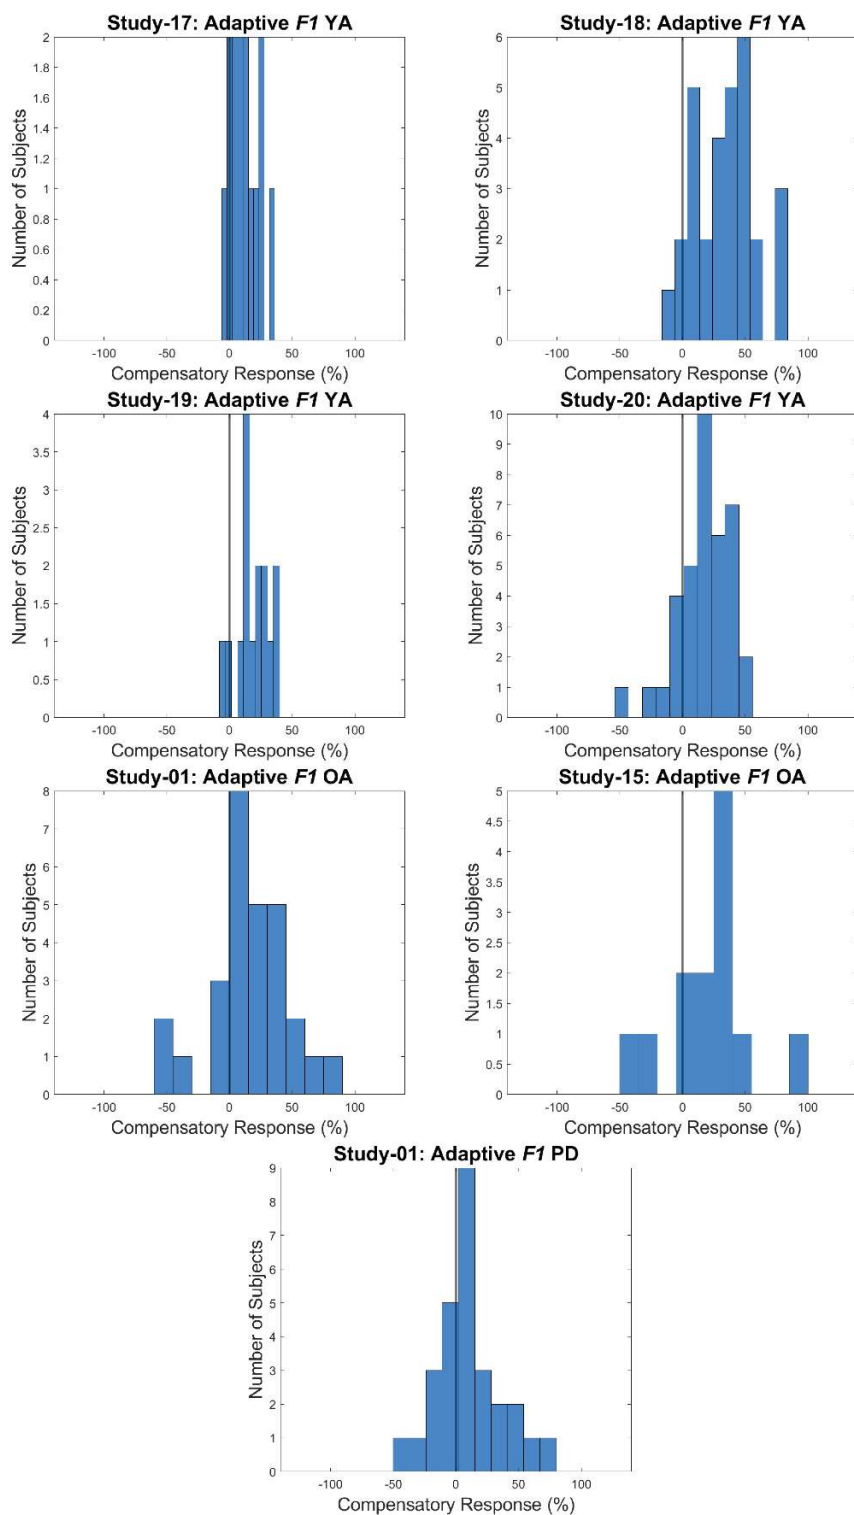

Supplement: Supplementary file 4 [file 1]
