# Supplementary material
Source: publisher figshare collection journal article supplement (https://asha.figshare.com/articles/dataset/_/24282676)
Supplement: Supplementary file 1 [file 1]

**Supplemental Material S4.** Modality test results for older adult (OA) & younger adult (YA) groups, analyzed separately.

**Table S6.** Results of modality tests for each task, with older adult (OA) and younger adult (YA) groups shown separately: *p*-values below .05 would indicate evidence of a distribution with two or more modes. The adaptive analyses are based on percent adaptation in the first three trials of the after-effect phase; reflexive analyses are based on percent compensation in the 100-250 ms window following perturbation onset.

| Task                           | Group | <i>p</i> -value |
|--------------------------------|-------|-----------------|
| Reflexive <i>F1</i>            | OA    | .458            |
| Reflexive <i>F1</i>            | YA    | .285            |
| Reflexive <i>f<sub>0</sub></i> | OA    | .399            |
| Reflexive <i>f<sub>0</sub></i> | YA    | .392            |
| Adaptive <i>F1</i>             | OA    | .341            |
| Adaptive <i>F1</i>             | YA    | .563            |
| Adaptive <i>f<sub>0</sub></i>  | OA    | .084            |
| Adaptive <i>f<sub>0</sub></i>  | YA    | .365            |
