# Supplementary material
Source: publisher figshare collection journal article supplement (https://asha.figshare.com/articles/dataset/_/24282676)
Supplement: Supplementary file 3 [file 1]

**Supplemental Material S1.** Sensitivity analyses for Silverman's modality tests. Power analyses were conducted to determine the sensitivity of Silverman's modality tests to detect bimodal distributions of different mixture probabilities ( $p$ ) and distances between distributions ( $D$ ). Power analyses were conducted for samples sizes of  $n = 110$  (our smallest neurotypical sample) and  $n = 308$  (our largest neurotypical sample).

**Figure S1.** Visual depiction of the resulting mixture probability distribution functions from the different combinations of mixture probabilities ( $p$ , shown along the x-axis) and distances between distributions ( $D$ , shown along the y-axis) that were tested in our power analyses. Power analyses evaluated the sensitivity of a Silverman test evaluating unimodality from a mixture distribution of two gaussians with equal variances and varying distances and mixture probabilities. Mixture probability ( $p$ ) refers to the percentage of the total sample that is present in each mode; e.g., if  $p = 0.5$ , 50% of the sample is in each gaussian distribution.  $D$  is the distance between the means of the two distributions, represented in these simulations as multiples of the distance  $D_0$ , the maximum distance between two gaussian distribution means still forming a unimodal mixture distribution (e.g.,  $D_0 = 2$  standard deviations for a  $p = 0.5$  mixture probability). Top row shows the case  $D = D_0$  where the two distributions combine to form a unimodal distribution. For larger values of  $D$  ( $D > D_0$ , second-to-fourth rows) the two distributions combine to form a bimodal distribution which can be detected by a Silverman test given a sufficiently large sample size.

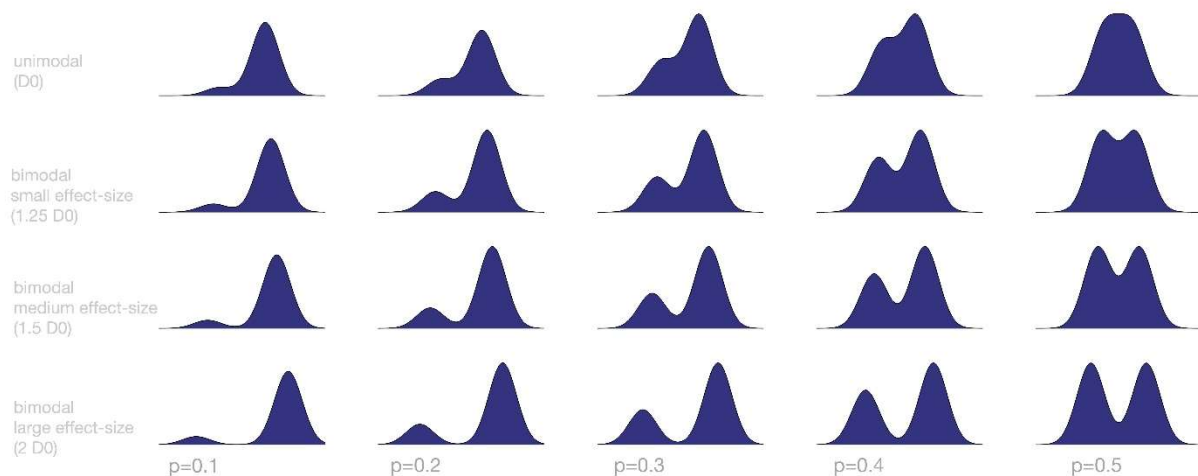

**Table S1.** Power at  $p < .05$  alpha level of Silverman test evaluating unimodality of  $N$  samples from a mixture distribution of two gaussians with equal variances and varying distances and mixture probabilities (note:  $D_0$  is the maximum distance between two gaussian distribution means forming a unimodal mixture distribution; e.g.,  $D_0 = 2$  standard deviations for a  $p = 0.5$  mixture probability). Analyses with sufficient power (above 80%) to detect a departure from unimodality with a Silverman test are highlighted in green.

| Distance                                  | Mixture probability | POWER ( $n = 110$ ) | POWER ( $n = 308$ ) |
|-------------------------------------------|---------------------|---------------------|---------------------|
| Small effect-size<br>( $1.25 \cdot D_0$ ) | $p = 0.5$           | 34% (27-42%)        | 59% (51-67%)        |
|                                           | $p = 0.4$           | 33% (26-41%)        | 63% (55-70%)        |
|                                           | $p = 0.3$           | 24% (18-32%)        | 66% (58-73%)        |
|                                           | $p = 0.2$           | 17% (12-24%)        | 43% (35-51%)        |
|                                           | $p = 0.1$           | 22% (16-30%)        | 30% (23-38%)        |
| Medium effect-size<br>( $1.5 \cdot D_0$ ) | $p = 0.5$           | 72% (64-79%)        | 99% (95-100%)       |
|                                           | $p = 0.4$           | 83% (76-88%)        | 99% (95-100%)       |
|                                           | $p = 0.3$           | 83% (76-88%)        | 100% (97-100%)      |
|                                           | $p = 0.2$           | 62% (54-70%)        | 98% (94-99%)        |
|                                           | $p = 0.1$           | 62% (54-70%)        | 94% (89-97%)        |
| Large effect-sizes<br>( $2 \cdot D_0$ )   | $p = 0.5$           | 99% (95-100%)       | 100% (97-100%)      |
|                                           | $p = 0.4$           | 100% (97-100%)      | 100% (97-100%)      |
|                                           | $p = 0.3$           | 100% (97-100%)      | 100% (97-100%)      |
|                                           | $p = 0.2$           | 100% (97-100%)      | 100% (97-100%)      |
|                                           | $p = 0.1$           | 99% (95-100%)       | 100% (97-100%)      |
